# Supplementary material for: A unique rhodium-catalyzed rearrangement process: isomerization of an alkyne to a 1,3-diene with concomitant migration of a formyl group. An expeditious route to dienals from readily available 4-alkynalsElectronic supplementary information (ESI) available: experimental details. See http://www.rsc.org/suppdata/cc/b2/b200208f/
Source: Royal Society of Chemistry journal article supplement (doi:10.1039/b200208f), 2002-03-04
Supplement: b200208f.doc [file b200208f.doc]

Supplementary data

A Unique Rhodium-Catalyzed Isomerization Process:

Rearrangement of an Alkyne to a 1,3-Diene with

Concomitant Migration of a Formyl Group. An Expeditious Route to Dienals

Ken Tanaka and Gregory C. Fu*

Department of Chemistry, Massachusetts Institute of Technology,

Cambridge, MA 02139

I. General

CH2Cl2 was purified by passage through a neutral alumina column under argon. [Rh(dppe)]BF4[[1]](#endnote-2) and [Rh(cod)(BINAP)]BF4[[2]](#endnote-3) were prepared according to literature procedures. All other reagents and solvents were obtained from commercial sources and used as received.

All reactions were carried out under an atmosphere of nitrogen or argon in oven-dried glassware with magnetic stirring, unless otherwise indicated.

II. Preparation of 4-Alkynals

**3-Methylundec-4-ynal.** This was prepared according to a literature procedure.[[3]](#endnote-4)

**3-Methyl-6-phenyl-4-hexynal.** This was prepared according to a literature procedure.[[4]](#endnote-5)

**5-Cyclohex-1-enyl-3-methylpent-4-ynal.** This was prepared according to a literature procedure.3**

**3-Methyl-5-phenylpent-4-ynal.** This was prepared according to a literature procedure.[[5]](#endnote-6)

**3-Phenyl-5-trimethylsilyl-4-pentynal.** This was prepared according to a literature procedure.4**

III. Rearrangement of 4-Alkynals to Dienals (Table 1; eq 2)

**General Procedure 1 (With a glove box; Table 1, entry 1; first run).** In a N2-filled glove box, [Rh(cod)(BINAP)]BF4(26 mg, 0.028 mmol) and CH2Cl2 (1.5 mL) were added to a Schlenk tube. Outside of the glove box, H2 was introduced to the Schlenk tube, and the mixture was stirred at room temperature for 0.5 hours. In a glove box, a solution of 3-methylundec-4-ynal (50 mg, 0.28 mmol) in CH2Cl2 (1 mL) was added to the dark-red solution. The mixture was stirred at room temperature for 24 hours. The resulting solution was concentrated and purified by column chromatography (pentane:Et2O = 10:1), which furnished (*E*)-2-isopropenylnon-2-enal (25.5 mg, 0.141 mmol; 51%).

**General Procedure 2 (Without a glove box; Table 1, entry 1; second run).** In the air, [Rh(cod)(BINAP)]BF4 (51 mg, 0.055 mmol) was placed into a Schlenk tube, which was then filled with argon. Under a positive pressure of argon, CH2Cl2 (3 mL) was added. H2 was then introduced to the Schlenk tube, and the mixture was stirred at room temperature for 0.5 hours. The flask was then purged with argon, and a solution of 3-methylundec-4-ynal (100 mg, 0.555 mmol) in CH2Cl2 (2 mL) was added to the dark-red reaction mixture. The mixture was stirred at room temperature for 24 hours. The resulting solution was concentrated and purified by column chromatography (pentane:Et2O = 10:1), which furnished (*E*)-2-isopropenylnon-2-enal (48.8 mg, 0.271 mmol; 49%).

**(*E*)-2-Isopropenylnon-2-enal.** Colorless oil; FTIR (neat) 2963, 2929, 1863, 1698, 1621, 1458, 897, 747, 700 cm–1; 1H NMR (CDCl3, 500 MHz) ** 9.39 (s, 1H), 6.50 (t, *J* = 7.5 Hz, 1H), 5.21 (m, 1H), 4.73-4.74 (m, 1H), 2.37 (dt, *J* = 7.5 and 7.5 Hz, 2H), 1.86 (s, 3H), 1.45-1.51 (m, 2H), 1.25-1.36 (m, 6H), 0.89 (t, *J* = 7.0 Hz, 3H); 13C NMR (CDCl3, 75 MHz) ** 194.6, 155.9, 147.2, 139.0, 117.4, 32.3, 30.3, 29.7, 29.5, 23.4, 23.2, 14.8. HRMS (EI) calcd for C12H20O (M+) 180.1509, found 180.1511.

**Table 1, entry 2.** Procedure 1 was followed, using 12 mg (0.014 mmol) of [Rh(cod)(BINAP)]BF4 and 50 mg (0.27 mmol) of 3-methyl-6-phenyl-4-hexynal. Reaction time: 40 h. (*E*)-2-Isopropenyl-4-phenylbut-2-enal was obtained in 53% yield.

A second run was carried out according to Procedure 2, using 25 mg (0.027 mmol) of [Rh(cod)(BINAP)]BF4 and 100 mg (0.537 mmol) of 3-methyl-6-phenyl-4-hexynal. Reaction time: 48 h. (*E*)-2-Isopropenyl-4-phenylbut-2-enal was obtained in 60% yield.

**(*E*)-2-Isopropenyl-4-phenylbut-2-enal.** Colorless oil; FTIR (neat) 3029, 2969, 2921, 1693, 1494, 1454, 1139, 906, 749 cm–1; 1H NMR (CDCl3, 300 MHz) ** 9.44 (s, 1H), 7.18-7.36 (m, 5H), 6.64 (t, *J* = 7.5 Hz, 1H), 5.31-5.32 (m, 1H), 4.87-4.88 (m, 1H), 3.73 (d, *J* = 7.5 Hz, 2H), 1.95 (t, *J* = 1.0 Hz, 3H); 13C NMR (CDCl3, 75 MHz) ** 194.4, 152.7, 147.3, 138.9, 138.8, 129.6, 129.2, 127.5, 118.1, 36.4, 23.5. HRMS (EI) calcd for C13H14O (M+) 186.1039, found 186.1040.

**Table 1, entry 3.** Procedure 1 was followed, using 13 mg (0.014 mmol) of [Rh(cod)(BINAP)]BF4 and 50 mg (0.28 mmol) of 5-cyclohex-1-enyl-3-methylpent-4-ynal. Reaction time: 20 h. (*E*)-2-Cyclohex-1-enylmethylene-3-methylbut-3-enal was obtained in 70% yield.

A second run was carried out according to Procedure 2, using 26 mg (0.028 mmol) of [Rh(cod)(BINAP)]BF4 and 100 mg (0.568 mmol) of 5-cyclohex-1-enyl-3-methylpent-4-ynal. Reaction time: 48 h. (*E*)-2-Cyclohex-1-enylmethylene-3-methylbut-3-enal was obtained in 74% yield.

**(*E*)-2-Cyclohex-1-enylmethylene-3-methylbut-3-enal.** Colorless oil; FTIR (neat) 2935, 2700, 1682, 1615, 1593, 1427, 1138, 900, 773 cm–1; 1H NMR (CDCl3, 500 MHz,) ** 9.38 (s, 1H), 6.67 (s, 1H), 6.29-6.31 (m, 1H), 5.20-5.21 (m, 1H), 4.77 (m, 1H), 2.23-2.32 (m, 4H), 1.91 (s, 3H), 1.58-1.66 (m, 4H); 13C NMR (CDCl3, 75 MHz) ** 195.5, 153.8, 142.0, 141.7, 140.2, 136.8, 118.0, 27.8, 27.6, 24.2, 23.2, 22.3. HRMS (EI) calcd for C12H16O (M+) 176.1196, found 176.1192.

**Table 1, entry 4.** Procedure 1 was followed, using 27 mg (0.029 mmol) of [Rh(cod)(BINAP)]BF4 and 50 mg (0.29 mmol) of 3-methyl-5-phenylpent-4-ynal. Reaction time: 24 h. (*E*)-2-Benzylidene-3-methylbut-3-enal was obtained in 59% yield.

A second run was carried out according to Procedure 2, using 53 mg (0.058 mmol) of [Rh(cod)(BINAP)]BF4 and 100 mg (0.580 mmol) 3-methyl-5-phenylpent-4-ynal. Reaction time: 40 h. (*E*)-2-Benzylidene-3-methylbut-3-enal was obtained in 57% yield.

**(*E*)-2-Benzylidene-3-methylbut-3-enal.** Colorless oil; FTIR (neat) 3079, 2951, 2701, 1686, 1609, 1453, 1131, 903, 758, 683 cm–1; 1H NMR (CDCl3, 500 MHz,) ** 9.57 (s, 1H), 7.68-7.70 (m, 2H), 7.39-7.42 (m, 3H), 7.15 (s, 1H), 5.35-5.37 (m, 1H), 4.96-4.97 (m, 1H), 1.94 (s, 3H); 13C NMR (CDCl3, 75 MHz) ** 194.5, 149.3, 144.5, 139.1, 134.9, 131.2, 131.1, 129.4, 118.5, 22.8. HRMS (EI) calcd for C12H12O (M+) 172.0883, found 172.0881.

**Table 1, entry 5.** Procedure 1 was followed, using 10 mg (0.011 mmol) of [Rh(cod)(BINAP)]BF4, 50 mg (0.22 mmol) of 3-phenyl-5-trimethylsilyl-4-pentynal, and 2.5 mL of acetone. Reaction temperature: 60 °C. Reaction time: 40 h. (*E*)-3-Phenyl-2-(trimethylsilanylmethylene)but-3-enal was obtained in 90% yield.

A second run was carried out according to Procedure 2, using 20 mg (0.022 mmol) of [Rh(cod)(BINAP)]BF4, 100 mg (0.434 mmol) of 3-phenyl-5-trimethylsilyl-4-pentynal, and 5.0 mL of acetone. Reaction temperature: 60 °C. Reaction time: 40 h. (*E*)-3-Phenyl-2-(trimethylsilanylmethylene)but-3-enal was obtained in 85% yield.

**(*E*)-3-Phenyl-2-(trimethylsilanylmethylene)but-3-enal.** Colorless oil; FTIR (neat) 2956, 2800, 1694, 1494, 1249, 1121, 863, 788, 703 cm–1; 1H NMR (CDCl3, 500 MHz,) ** 9.57 (s, 1H), 7.25-7.33 (m, 5H), 7.06 (s, 1H), 5.82 (s, 1H), 5.14 (s, 1H), 0.13 (s, 9H); 13C NMR (CDCl3, 75 MHz) ** 194.8, 157.2, 156.6, 144.5, 139.0, 129.2, 128.7, 126.8, 117.2, 0.1. HRMS (EI) calcd for C14H18O (M+) 230.1121, found 230.1125.

**Eq 2.** Procedure 1 was followed, using 5.0 mg (0.0055 mmol) of [Rh(cod)(BINAP)]BF4 and 10 mg (0.055 mmol) of 1-deuterio-3-methylundec-4-ynal. *n*-Tridecane (10 L) was added as an internal standard. Reaction time: 24 h. After column chromatography (Et2O), the crude product was analyzed by GC. (*E*)-3-Deuterio-2-isopropenylnon-2-enal and 3-deuterio-2-hexyl-4-methylcyclopent-2-enone3** were obtained in 34% and 46% yield, respectively.

**(*E*)-3-Deuterio-2-isopropenylnon-2-enal.** Colorless oil; 1H NMR (CDCl3, 500 MHz) ** 9.40 (s, 1H), 5.21-5.22 (m, 1H), 4.73-4.75 (m, 1H), 2.37 (t, *J* = 7.5 Hz, 2H), 1.86 (s, 3H), 1.43-1.50 (m, 2H), 1.20-1.37 (m, 6H), 0.89 (t, *J* = 7.0 Hz, 3H); 2H NMR (CHCl3) ** 6.27 (s).

IV. References

1. (?) Halpern, J.; Riley, D. P.; Chan, A. S. C.; Pluth, J. J. *J. Am. Chem. Soc*. **1977**, *99*, 8055-8057. [↑](#endnote-ref-2)
2. (?) Tani, K.; Yamagata, T.; Akutagawa, S.; Kumobayashi, H.; Taketomi, T.; Takaya, H.; Miyashita, A.; Noyori, R.; Otsuka, S. *J. Am. Chem. Soc.* **1984**, *106*, 5208-5217. [↑](#endnote-ref-3)
3. (?) Tanaka, K.; Fu. G. C. *J. Am. Chem. Soc.* **2001**, *123*, 11492-11493. [↑](#endnote-ref-4)
4. (?) Tanaka, K.; Fu, G. C., submitted for publication.** [↑](#endnote-ref-5)
5. (?) Eriksson, M.; Iliefski, T.; Nilsson, M.; Olsson, T. *J. Org. Chem*. **1997**, *62*, 182-187. [↑](#endnote-ref-6)
